# Supplementary material for: Floral Assemblages and Patterns of Insect Herbivory during the Permian to Triassic of Northeastern Italy
Source: PLOS journal article supplement (doi:10.1371/journal.pone.0165205), 2016-11-09
Supplement: S12 (10.1371/journal.pone.0165205.s012) [file journal.pone.0165205.s012]

**S12 Table.** Insect herbivory of St. Veit-Innerkohlbach, near Prags/Braies, Wengen/La Valle Formation of the Middle Triassic (Ladinian) from the Dolomites Region of northeastern Italy.

| Taxa/groups, their abundances & percentages | Specimen number | Percent damage | Percent specialized | Percent galls | Percent miners | Number of DTs | Specialized DTs | Generalized DTs | Intermediate DTs | FFGs |
|---------------------------------------------|-----------------|----------------|---------------------|---------------|----------------|---------------|-----------------|-----------------|------------------|------|
| <b>Pteridophytes</b> [4, 8.69 %]            |                 |                |                     |               |                |               |                 |                 |                  |      |
| <i>Cladophlebis leuthardtii</i>             | 2               | 0.5            | 0                   | 0             | 0              | 1             | 0               | 1               | 0                | 1    |
| <i>Marattiopsis</i> sp.                     | 2               | 0.5            | 0                   | 0             | 0.5            | 1             | 1               | 0               | 0                | 1    |
| <b>Coniferophytes</b> [37, 80.43 %]         |                 |                |                     |               |                |               |                 |                 |                  |      |
| <i>Pelourdea vogesiaca</i>                  | 5               | 0              | 0                   | 0             | 0              | 0             | 0               | 0               | 0                | 0    |
| <i>Voltzia dolomitica</i>                   | 15              | 0              | 0                   | 0             | 0              | 0             | 0               | 0               | 0                | 0    |
| <i>Voltzia ladinica</i>                     | 5               | 0              | 0                   | 0             | 0              | 0             | 0               | 0               | 0                | 0    |
| <i>Voltzia pragsensis</i>                   | 3               | 0              | 0                   | 0             | 0              | 0             | 0               | 0               | 0                | 0    |
| <i>Voltzia</i> sp.                          | 2               | 0              | 0                   | 0             | 0              | 0             | 0               | 0               | 0                | 0    |
| conifer wood indet.                         | 7               | 0              | 0                   | 0             | 0              | 0             | 0               | 0               | 0                | 0    |
| <b>Pteridosperms</b> [3, 6.52 %]            |                 |                |                     |               |                |               |                 |                 |                  |      |
| <i>Ptilozamites sandbergeri</i>             | 3               | 0.3333         | 0.3333              | 0.3333        | 0              | 1             | 1               | 0               | 0                | 1    |
| <b>Incertae Sedis</b> [2, 4.34 %]           |                 |                |                     |               |                |               |                 |                 |                  |      |
| seed indet.                                 | 2               | 0              | 0                   | 0             | 0              | 0             | 0               | 0               | 0                | 0    |
| TOTALS                                      | 46              | 0.0652         | 0.0434              | 0.0217        | 0.0217         | 3             | 2               | 1               | 0                | 3    |
